# Supplementary material
Source: HighWire-hosted journal article supplement (https://nutrition.bmj.com/content/6/1/28)
Supplement: inline-supplementary-material-1 [file inline-supplementary-material-1.pdf]

**SUPPLEMENTAL MATERIAL****Worldwide Associations of Fruit and Vegetable Supply with Blood Pressure from 1975 to 2015**

**Appendix Table 1.** Sub-components of the fruit and vegetable groups used in analysis.

| Item Group | Item                                 |
|------------|--------------------------------------|
| Fruits     | Apples and products                  |
|            | Bananas                              |
|            | Citrus (other)                       |
|            | Dates                                |
|            | Fruits (other)                       |
|            | Grapefruit and products              |
|            | Grapes and products (excluding wine) |
|            | Lemons, limes, and products          |
|            | Oranges, mandarins                   |
|            | Pineapples and products              |
|            | Plantains                            |
| Vegetables | Onions                               |
|            | Tomatoes and products                |
|            | Vegetables (other)                   |

**Appendix Table 2.** Countries included in analysis by World Bank income classification.

| Region              | Countries                                                                                                                                                                                                                                                                                                                                                                                                                                                                                                                           |
|---------------------|-------------------------------------------------------------------------------------------------------------------------------------------------------------------------------------------------------------------------------------------------------------------------------------------------------------------------------------------------------------------------------------------------------------------------------------------------------------------------------------------------------------------------------------|
| Low income          | Afghanistan, Benin, Burkina Faso, Central African Republic, Chad, Gambia, Guinea, Guinea Bissau, Haiti, Liberia, Madagascar, Malawi, Mali, Mozambique, Nepal, Niger, North Korea, Rwanda, Sierra Leone, Tajikistan, Tanzania, Togo, Uganda, Yemen                                                                                                                                                                                                                                                                                   |
| Lower middle income | Angola, Bangladesh, Bolivia, Cabo Verde, Cambodia, Cameroon, Congo, Cote d'Ivoire, Djibouti, Egypt, El Salvador, Eswatini, Ghana, Honduras, India, Indonesia, Kenya, Kiribati, Kyrgyzstan, Lao PDR, Lesotho, Mauritania, Moldova, Mongolia, Morocco, Myanmar, Nicaragua, Nigeria, Pakistan, Philippines, Sao Tome and Principe, Senegal, Solomon Islands, Timor-Leste, Tunisia, Ukraine, Uzbekistan, Vanuatu, Viet Nam, Zambia, Zimbabwe                                                                                            |
| Upper middle income | Albania, Algeria, Argentina, Armenia, Azerbaijan, Belarus, Belize, Botswana, Brazil, Bulgaria, China, Colombia, Costa Rica, Cuba, Dominica, Dominican Republic, Ecuador, Fiji, Gabon, Georgia, Grenada, Guatemala, Guyana, Iran, Iraq, Jamaica, Jordan, Kazakhstan, Lebanon, Malaysia, Mauritius, Mexico, Namibia, Paraguay, Peru, Romania, Russian Federation, Saint Lucia, Saint Vincent and the Grenadines, Samoa, South Africa, Sri Lanka, Suriname, Thailand, Turkey, Turkmenistan, Venezuela                                  |
| High income         | Antigua and Barbuda, Australia, Austria, Bahamas, Barbados, Belgium, Canada, Chile, China (Hong Kong SAR), Cyprus, Czechia, Denmark, Estonia, Finland, France, French Polynesia, Germany, Greece, Hungary, Iceland, Ireland, Israel, Italy, Japan, Kuwait, Latvia, Lithuania, Luxembourg, Malta, Netherlands, New Zealand, Norway, Panama, Poland, Portugal, Saint Kitts and Nevis, Saudi Arabia, Slovakia, South Korea, Spain, Sweden, Switzerland, Taiwan, Trinidad and Tobago, United Kingdom, United States of America, Uruguay |

**Appendix Table 3.** Description of models fitted.

| Model number | Response variable | Explanatory variable                                  | Other terms included                                                                 |
|--------------|-------------------|-------------------------------------------------------|--------------------------------------------------------------------------------------|
| 1            | RBP, DBP, or SBP  | Energy-adjusted supply of fruits, vegetables, or both | Urbanisation, year                                                                   |
| 2            |                   |                                                       | As Model 1 + energy-adjusted supply from fish, cereals, meat, milk, and total energy |
| 3            |                   |                                                       | As Model 2 + BMI                                                                     |
| 4            |                   |                                                       | As Model 3 + World Bank region                                                       |
| 5            |                   |                                                       | As Model 4 + World Bank:explanatory variable interaction                             |
| 6            |                   |                                                       | As Model 5 + BMI:explanatory variable interaction                                    |

**Appendix Table 4.** Akaike Information Criterion (AIC) for the models fitted. Relative values are shown, with the best fitting models having values of zero.

| Response variable | Explanatory variable  | Time period | AIC     |         |         |         |         |         |
|-------------------|-----------------------|-------------|---------|---------|---------|---------|---------|---------|
|                   |                       |             | Model 1 | Model 2 | Model 3 | Model 4 | Model 5 | Model 6 |
| SBP               | Fruits and vegetables | 2005-2015   | 319.5   | 157.7   | 150.4   | 40.9    | 2.4     | 0       |
| SBP               | Fruits and vegetables | 1995-2004   | 233.6   | 99.7    | 100.9   | 9.7     | 0.2     | 0       |
| SBP               | Fruits and vegetables | 1985-1994   | 273.1   | 169.1   | 170.8   | 8.2     | 1.4     | 0       |
| SBP               | Fruits and vegetables | 1975-1984   | 355.6   | 212.1   | 204.1   | 13.7    | 1.9     | 0       |
| DBP               | Fruits and vegetables | 2005-2015   | 292.8   | 53.1    | 51.4    | 0       | 2.9     | 1.4     |
| DBP               | Fruits and vegetables | 1995-2004   | 238.4   | 33.7    | 35.7    | 0       | 4.9     | 5.6     |
| DBP               | Fruits and vegetables | 1985-1994   | 334.2   | 127.0   | 129.0   | 9.7     | 0       | 2.0     |
| DBP               | Fruits and vegetables | 1975-1984   | 508.9   | 135.4   | 121.1   | 0       | 1.4     | 1.8     |
| Raised BP         | Fruits and vegetables | 2005-2015   | 340.7   | 141.8   | 125.3   | 41.1    | 4.4     | 0       |
| Raised BP         | Fruits and vegetables | 1995-2004   | 221.4   | 76.3    | 68.6    | 4.6     | 1.6     | 0       |
| Raised BP         | Fruits and vegetables | 1985-1994   | 314.3   | 151.2   | 149.6   | 4.7     | 0       | 0.1     |
| Raised BP         | Fruits and vegetables | 1975-1984   | 401.3   | 180.3   | 179.0   | 9.0     | 3.5     | 0       |
| SBP               | Fruits                | 2005-2015   | 325.3   | 152.6   | 144.0   | 31.6    | 0       | 1.7     |
| SBP               | Fruits                | 1995-2004   | 255.2   | 106.1   | 107.0   | 15.5    | 0       | 1.0     |
| SBP               | Fruits                | 1985-1994   | 288.0   | 178.0   | 179.7   | 22.2    | 23.7    | 0       |
| SBP               | Fruits                | 1975-1984   | 374.3   | 222.1   | 214.2   | 32.8    | 34.0    | 0       |
| DBP               | Fruits                | 2005-2015   | 312.2   | 68.4    | 65.3    | 9.7     | 0.7     | 0       |
| DBP               | Fruits                | 1995-2004   | 231.9   | 39.4    | 41.2    | 0.1     | 2.4     | 0       |
| DBP               | Fruits                | 1985-1994   | 332.1   | 150.1   | 152.0   | 33.0    | 14.4    | 0       |
| DBP               | Fruits                | 1975-1984   | 483.2   | 142.0   | 127.8   | 9.3     | 5.2     | 0       |
| Raised BP         | Fruits                | 2005-2015   | 292.4   | 106.0   | 90.4    | 5.3     | 0       | 0.9     |
| Raised BP         | Fruits                | 1995-2004   | 224.5   | 71.7    | 64.4    | 0       | 3.3     | 3.0     |
| Raised BP         | Fruits                | 1985-1994   | 336.5   | 170.5   | 168.9   | 23.7    | 21.1    | 0       |
| Raised BP         | Fruits                | 1975-1984   | 440.5   | 218.8   | 217.5   | 50.4    | 26.0    | 0       |

|           |            |           |       |       |       |       |      |   |
|-----------|------------|-----------|-------|-------|-------|-------|------|---|
| SBP       | Vegetables | 2005-2015 | 381.7 | 188.6 | 180.0 | 67.6  | 33.4 | 0 |
| SBP       | Vegetables | 1995-2004 | 324.1 | 139.1 | 140.0 | 48.4  | 25.4 | 0 |
| SBP       | Vegetables | 1985-1994 | 388.9 | 237.6 | 239.3 | 81.9  | 23.9 | 0 |
| SBP       | Vegetables | 1975-1984 | 508.6 | 307.3 | 299.4 | 117.9 | 49.8 | 0 |
| DBP       | Vegetables | 2005-2015 | 335.3 | 97.2  | 94.1  | 38.4  | 37.4 | 0 |
| DBP       | Vegetables | 1995-2004 | 273.4 | 67.0  | 68.8  | 27.8  | 22.8 | 0 |
| DBP       | Vegetables | 1985-1994 | 386.6 | 170.2 | 172.2 | 53.2  | 26.1 | 0 |
| DBP       | Vegetables | 1975-1984 | 596.2 | 195.9 | 181.7 | 63.2  | 37.8 | 0 |
| Raised BP | Vegetables | 2005-2015 | 510.1 | 202.0 | 186.5 | 101.3 | 42.3 | 0 |
| Raised BP | Vegetables | 1995-2004 | 405.3 | 156.1 | 148.8 | 84.4  | 37.0 | 0 |
| Raised BP | Vegetables | 1985-1994 | 535.8 | 270.7 | 269.1 | 124.0 | 46.9 | 0 |
| Raised BP | Vegetables | 1975-1984 | 663.0 | 296.0 | 294.7 | 127.5 | 40.8 | 0 |

**Appendix Table 5.** Ranking of countries by fruit supply (portions/capita/day) in 1975 and 2015 and change from 1975 to 2015.

| Rank | 1975         |        | 2015                  |        | Change                |        |
|------|--------------|--------|-----------------------|--------|-----------------------|--------|
|      | Country      | Supply | Country               | Supply | Country               | Supply |
| 1    | Rwanda       | 13.8   | Dominica              | 12.8   | Sao Tome and Principe | +5.9   |
| 2    | Samoa        | 9.2    | Dominican Republic    | 8.9    | Dominica              | +5.1   |
| 3    | Ecuador      | 8.3    | Rwanda                | 8.7    | Albania               | +4.3   |
| 4    | Dominica     | 7.7    | Sao Tome and Principe | 7.2    | Lao PDR               | +4.1   |
| 5    | Saint Lucia  | 6.9    | Colombia              | 6.2    | Cuba                  | +3.6   |
| .... | ....         | ....   | ....                  | ....   | ....                  | ....   |
| 155  | Gambia       | 0.2    | Zambia                | 0.3    | Cote d'Ivoire         | -3.3   |
| 156  | Burkina Faso | 0.2    | Togo                  | 0.3    | Luxembourg            | -3.9   |
| 157  | Niger        | 0.2    | Chad                  | 0.3    | Ecuador               | -4.3   |
| 158  | China        | 0.2    | Gambia                | 0.2    | Saint Lucia           | -4.8   |
| 159  | Mongolia     | 0.1    | Burkina Faso          | 0.2    | Rwanda                | -5.0   |

**Appendix Table 6.** Ranking of countries by vegetable supply (portions/capita/day) in 1975 and 2015 and change from 1975 to 2015.

| Rank | 1975        |        | 2015                  |        | Change  |        |
|------|-------------|--------|-----------------------|--------|---------|--------|
|      | Country     | Supply | Country               | Supply | Country | Supply |
| 1    | Greece      | 9.4    | Armenia               | 14.2   | China   | +11.2  |
| 2    | Israel      | 6.2    | China                 | 12.8   | Armenia | +9.5   |
| 3    | Spain       | 6.2    | Tunisia               | 10.9   | Lao PDR | +8.6   |
| 4    | Italy       | 5.7    | Uzbekistan            | 10.8   | Guyana  | +8.1   |
| 5    | Portugal    | 5.7    | Lao PDR               | 9.0    | Albania | +6.7   |
| .... | ....        | ....   | ....                  | ....   | ....    | ....   |
| 155  | Saint Lucia | 0.4    | Zimbabwe              | 0.5    | Bahamas | -1.8   |
| 156  | Chad        | 0.3    | Burkina Faso          | 0.5    | Moldova | -1.9   |
| 157  | Samoa       | 0.2    | Solomon Islands       | 0.5    | Spain   | -1.9   |
| 158  | Cabo Verde  | 0.2    | Sao Tome and Principe | 0.5    | Iraq    | -2.6   |
| 159  | Mauritania  | 0.1    | Chad                  | 0.3    | Greece  | -3.9   |



**Appendix Table 7.** Akaike Information Criterion (AIC) for the sensitivity analysis. Relative values are shown, with the best fitting models having values of zero.

| Response variable | Explanatory variable  | Time period | AIC     |         |         |         |         |         |
|-------------------|-----------------------|-------------|---------|---------|---------|---------|---------|---------|
|                   |                       |             | Model 1 | Model 2 | Model 3 | Model 4 | Model 5 | Model 6 |
| SBP               | Fruits and vegetables | 2005-2015   | 299.2   | 71.3    | 56.0    | 34.4    | 1.9     | 0       |
| SBP               | Fruits and vegetables | 1995-2004   | 352.6   | 64.0    | 48.5    | 35.6    | 0       | 1.9     |
| SBP               | Fruits and vegetables | 1985-1994   | 338.1   | 50.1    | 11.5    | 3.8     | 0.4     | 0       |
| SBP               | Fruits and vegetables | 1975-1984   | 344.9   | 127.2   | 89.1    | 3.9     | 2.6     | 0       |
| DBP               | Fruits and vegetables | 2005-2015   | 328.6   | 35.1    | 24.7    | 23.2    | 3.1     | 0       |
| DBP               | Fruits and vegetables | 1995-2004   | 318.6   | 13.9    | 4.4     | 0       | 4.1     | 5.7     |
| DBP               | Fruits and vegetables | 1985-1994   | 419.5   | 47.8    | 24.7    | 1.8     | 0       | 1.5     |
| DBP               | Fruits and vegetables | 1975-1984   | 505.5   | 98.0    | 57.9    | 0       | 2.1     | 2.2     |
| Raised BP         | Fruits and vegetables | 2005-2015   | 371.5   | 55.1    | 45.5    | 34.1    | 7.4     | 0       |
| Raised BP         | Fruits and vegetables | 1995-2004   | 353.1   | 24.0    | 26.0    | 25.0    | 0       | 0.4     |
| Raised BP         | Fruits and vegetables | 1985-1994   | 437.7   | 27.5    | 6.5     | 3.7     | 0       | 1.5     |
| Raised BP         | Fruits and vegetables | 1975-1984   | 437.2   | 87.9    | 44.9    | 3.2     | 3.5     | 0       |
| SBP               | Fruits                | 2005-2015   | 328.0   | 86.5    | 68.5    | 45.0    | 0       | 1.8     |
| SBP               | Fruits                | 1995-2004   | 367.5   | 63.2    | 43.1    | 32.6    | 0.7     | 0       |
| SBP               | Fruits                | 1985-1994   | 369.7   | 75.9    | 36.6    | 31.6    | 30.0    | 0       |
| SBP               | Fruits                | 1975-1984   | 368.3   | 144.8   | 108.4   | 30.6    | 33.7    | 0       |
| DBP               | Fruits                | 2005-2015   | 424.4   | 52.9    | 39.2    | 35.2    | 0.3     | 0       |
| DBP               | Fruits                | 1995-2004   | 340.2   | 25.3    | 12.0    | 0.5     | 3.9     | 0       |
| DBP               | Fruits                | 1985-1994   | 416.7   | 71.9    | 48.5    | 18.2    | 15.3    | 0       |
| DBP               | Fruits                | 1975-1984   | 475.0   | 107.2   | 68.7    | 11.1    | 4.8     | 0       |
| Raised BP         | Fruits                | 2005-2015   | 293.3   | 28.3    | 19.7    | 7.6     | 0       | 0.9     |
| Raised BP         | Fruits                | 1995-2004   | 305.3   | 2.7     | 4.6     | 3.3     | 2.5     | 0       |
| Raised BP         | Fruits                | 1985-1994   | 449.9   | 50.7    | 29.6    | 25.0    | 27.7    | 0       |
| Raised BP         | Fruits                | 1975-1984   | 481.2   | 137.6   | 95.5    | 54.2    | 30.0    | 0       |

|           |            |           |       |       |       |      |      |   |
|-----------|------------|-----------|-------|-------|-------|------|------|---|
| SBP       | Vegetables | 2005-2015 | 317.2 | 76.0  | 58.0  | 34.4 | 22.5 | 0 |
| SBP       | Vegetables | 1995-2004 | 393.2 | 47.7  | 27.6  | 17.1 | 8.0  | 0 |
| SBP       | Vegetables | 1985-1994 | 412.0 | 68.6  | 29.4  | 24.4 | 11.5 | 0 |
| SBP       | Vegetables | 1975-1984 | 488.0 | 208.0 | 171.6 | 93.9 | 43.1 | 0 |
| DBP       | Vegetables | 2005-2015 | 285.4 | 48.9  | 35.2  | 31.3 | 26.2 | 0 |
| DBP       | Vegetables | 1995-2004 | 303.3 | 35.9  | 22.6  | 11.1 | 9.0  | 0 |
| DBP       | Vegetables | 1985-1994 | 463.2 | 86.8  | 63.4  | 33.1 | 17.4 | 0 |
| DBP       | Vegetables | 1975-1984 | 590.9 | 152.8 | 114.3 | 56.7 | 37.9 | 0 |
| Raised BP | Vegetables | 2005-2015 | 417.8 | 74.6  | 66.0  | 53.9 | 30.8 | 0 |
| Raised BP | Vegetables | 1995-2004 | 448.9 | 44.3  | 46.1  | 44.8 | 18.7 | 0 |
| Raised BP | Vegetables | 1985-1994 | 576.4 | 69.9  | 48.8  | 44.2 | 31.5 | 0 |
| Raised BP | Vegetables | 1975-1984 | 669.7 | 181.9 | 139.9 | 98.6 | 41.5 | 0 |

1 **Appendix Table 8.** Associations of explanatory variables with blood pressure variables by time period for the sensitivity analysis. Significant associations are  
 2 highlighted.  
 3

| Response variable | Explanatory variable | Time period |              |                       |           |              |                      |           |              |         |           |              |                       |
|-------------------|----------------------|-------------|--------------|-----------------------|-----------|--------------|----------------------|-----------|--------------|---------|-----------|--------------|-----------------------|
|                   |                      | 1975-1984   |              |                       | 1985-1994 |              |                      | 1995-2004 |              |         | 2005-2015 |              |                       |
|                   |                      | Coef        | CI           | p-value               | Coef      | CI           | p-value              | Coef      | CI           | p-value | Coef      | CI           | p-value               |
| SBP               | Combined FV          | -0.66       | -0.99, -0.33 | 0.02                  | -0.47     | -0.78, -0.15 | 0.72                 | -0.33     | -0.64, -0.01 | 1       | -         | -1.10, -0.32 | 0.09                  |
| SBP               | Fruits               | -1.31       | -1.79, -0.82 | $2.9 \times 10^{-5}$  | -0.72     | -1.16, -0.28 | 0.32                 | -0.38     | -0.83, 0.07  | 1       | -         | -1.23, -0.16 | 1                     |
| SBP               | Vegetables           | 0.11        | -0.38, 0.61  | 1                     | -0.39     | -0.88, 0.11  | 1                    | -0.32     | -0.81, 0.16  | 1       | -         | -1.48, -0.32 | 0.50                  |
| DBP               | Combined FV          | -0.17       | -0.39, 0.04  | 1                     | -0.16     | -0.36, 0.05  | 1                    | 0.10      | -0.12, 0.32  | 1       | -         | -0.43, 0.11  | 1                     |
| DBP               | Fruits               | -0.61       | -0.92, -0.29 | 0.04                  | -0.61     | -0.90, -0.31 | 0.01                 | -0.25     | -0.56, 0.07  | 1       | -         | -0.91, -0.17 | 0.86                  |
| DBP               | Vegetables           | 0.33        | 0.01, 0.66   | 1                     | 0.25      | -0.07, 0.58  | 1                    | 0.51      | 0.18, 0.84   | 0.50    | 0.40      | 0.00, 0.79   | 1                     |
| Raised BP         | Combined FV          | -1.38       | -1.78, -0.99 | $2.0 \times 10^{-9}$  | -0.82     | -1.20, -0.44 | $4.5 \times 10^{-3}$ | -0.78     | -1.16, -0.40 | 0.01    | -         | -1.65, -0.82 | $1.84 \times 10^{-6}$ |
| Raised BP         | Fruits               | -2.49       | -3.07, -1.92 | $1.0 \times 10^{-14}$ | -1.23     | -1.77, -0.69 | $1.8 \times 10^{-3}$ | -0.65     | -1.20, -0.10 | 1       | -         | -1.62, -0.46 | 0.10                  |

|           |            |       |             |   |       |              |   |       |              |      |       |              |      |
|-----------|------------|-------|-------------|---|-------|--------------|---|-------|--------------|------|-------|--------------|------|
| Raised BP | Vegetables | -0.15 | -0.75, 0.44 | 1 | -0.62 | -1.21, -0.02 | 1 | -0.90 | -1.47, -0.32 | 0.48 | -1.26 | -1.88, -0.64 | 0.02 |
|-----------|------------|-------|-------------|---|-------|--------------|---|-------|--------------|------|-------|--------------|------|

1

**Appendix Table 9.** Regression coefficients for models of RBP against combined fruit and vegetable supply for the sensitivity analysis. Coefficients for life expectancy are highlighted.

| Term                                | Time period |               |           |               |           |               |           |                |
|-------------------------------------|-------------|---------------|-----------|---------------|-----------|---------------|-----------|----------------|
|                                     | 1975-1984   |               | 1985-1994 |               | 1995-2004 |               | 2005-2015 |                |
|                                     | Coef        | 95% CI        | Coef      | 95% CI        | Coef      | 95% CI        | Coef      | 95% CI         |
| Intercept                           | 42.13       | 39.38, 44.89  | 52.20     | 49.41, 54.99  | 51.97     | 49.62, 54.31  | 51.13     | 48.77, 53.49   |
| Combined fruit and vegetable supply | -1.38       | -1.78, -0.99  | -0.82     | -1.20, -0.44  | -0.78     | -1.16, -0.40  | -1.23     | -1.65, -0.82   |
| Urban population proportion         | 0.17        | 0.16, 0.18    | 0.13      | 0.11, 0.14    | 0.05      | 0.04, 0.06    | -0.03     | -0.04, -0.02   |
| Year                                | -0.15       | -0.21, -0.09  | -0.13     | -0.19, -0.07  | -0.15     | -0.21, -0.10  | -0.08     | -0.13, -0.04   |
| Energy-adjusted supply from fish    | 0.003       | -0.009, 0.015 | -0.003    | -0.016, 0.009 | -0.012    | -0.024, 0.001 | -0.013    | -0.025, -0.001 |
| Energy-adjusted supply from cereals | 0.009       | 0.005, 0.014  | 0.012     | 0.007, 0.017  | 0.012     | 0.007, 0.017  | 0.014     | 0.009, 0.018   |
| Energy-adjusted supply from meat    | 0.027       | 0.017, 0.037  | 0.028     | 0.018, 0.038  | 0.017     | 0.007, 0.027  | 0.025     | 0.016, 0.034   |
| Energy-adjusted supply from milk    | 0.016       | 0.013, 0.020  | 0.020     | 0.017, 0.024  | 0.020     | 0.017, 0.023  | 0.017     | 0.014, 0.020   |
| Total energy                        | 0.002       | 0.002, 0.003  | 0.002     | 0.002, 0.003  | 0.002     | 0.001, 0.002  | 0.001     | 0.001, 0.002   |
| BMI                                 | 0.85        | 0.56, 1.14    | 0.37      | 0.08, 0.66    | -0.16     | -0.42, 0.10   | -0.45     | -0.68, -0.23   |
| Low-income group                    | 3.91        | 1.97, 5.86    | 2.05      | 0.14, 3.96    | -0.21     | -1.93, 1.51   | -1.22     | -2.79, 0.34    |
| Lower-middle-income group           | 2.14        | 0.55, 3.73    | 1.01      | -0.57, 2.58   | -2.36     | -3.82, -0.90  | -3.33     | -4.67, -2.00   |
| Upper-middle-income group           | 0.52        | -0.74, 1.79   | 0.17      | -1.07, 1.40   | -1.46     | -2.72, -0.21  | -2.04     | -3.23, -0.86   |
| Life expectancy                     | -0.17       | -0.20, -0.14  | -0.34     | -0.38, -0.31  | -0.34     | -0.37, -0.31  | -0.32     | -0.35, -0.29   |
| Interaction: BMI                    | -0.16       | -0.29, -0.03  | -0.05     | -0.20, 0.09   | 0.08      | -0.05, 0.21   | 0.16      | 0.06, 0.26     |
| Interaction: low-income group       | -0.35       | -1.23, 0.53   | -0.61     | -1.48, 0.26   | -0.06     | -0.84, 0.72   | 0.97      | 0.28, 1.65     |

|                                        |       |             |       |             |      |            |      |            |
|----------------------------------------|-------|-------------|-------|-------------|------|------------|------|------------|
| Interaction: lower-middle-income group | -0.41 | -1.18, 0.35 | -0.14 | -0.89, 0.61 | 1.04 | 0.39, 1.68 | 1.64 | 1.09, 2.19 |
| Interaction: upper-middle-income group | 0.25  | -0.28, 0.78 | 0.34  | -0.17, 0.84 | 0.62 | 0.13, 1.12 | 0.99 | 0.51, 1.46 |

1

2

**Appendix Table 10.** Associations of explanatory variables with blood pressure variables for the whole period from 1975 to 2015. Significant associations are highlighted.

| Response variable | Explanatory variable | Coef  | 95% CI       | p-value                |
|-------------------|----------------------|-------|--------------|------------------------|
| SBP               | Combined FV          | -0.76 | -0.94, -0.57 | $7.19 \times 10^{-15}$ |
| SBP               | Fruits               | -0.95 | -1.21, -0.68 | $2.32 \times 10^{-11}$ |
| SBP               | Vegetables           | -0.75 | -1.04, -0.46 | $2.97 \times 10^{-6}$  |
| DBP               | Combined FV          | -0.30 | -0.43, -0.18 | $1.99 \times 10^{-5}$  |
| DBP               | Fruits               | -0.74 | -0.92, -0.56 | $5.58 \times 10^{-15}$ |
| DBP               | Vegetables           | 0.07  | -0.13, 0.26  | 1                      |
| RBP               | Combined FV          | -1.26 | -1.50, -1.02 | $5.05 \times 10^{-24}$ |
| RBP               | Fruits               | -1.65 | -2.00, -1.31 | $6.81 \times 10^{-20}$ |
| RBP               | Vegetables           | -1.16 | -1.54, -0.79 | $1.01 \times 10^{-8}$  |

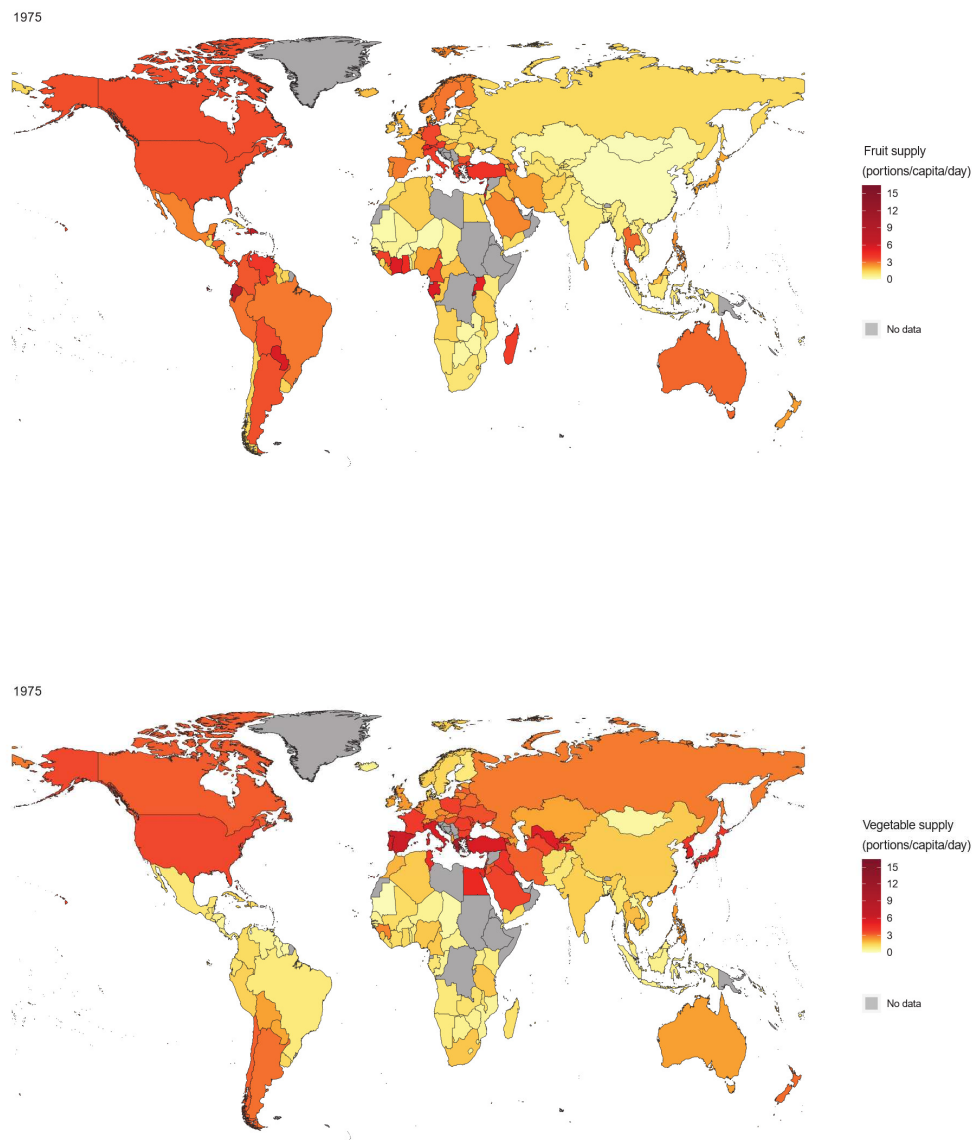

- 1
- 2 **Appendix Figure 1.** Fruit and vegetable supply by country in 1975. Grey colour indicates that countries
- 3 were not included in analyses.



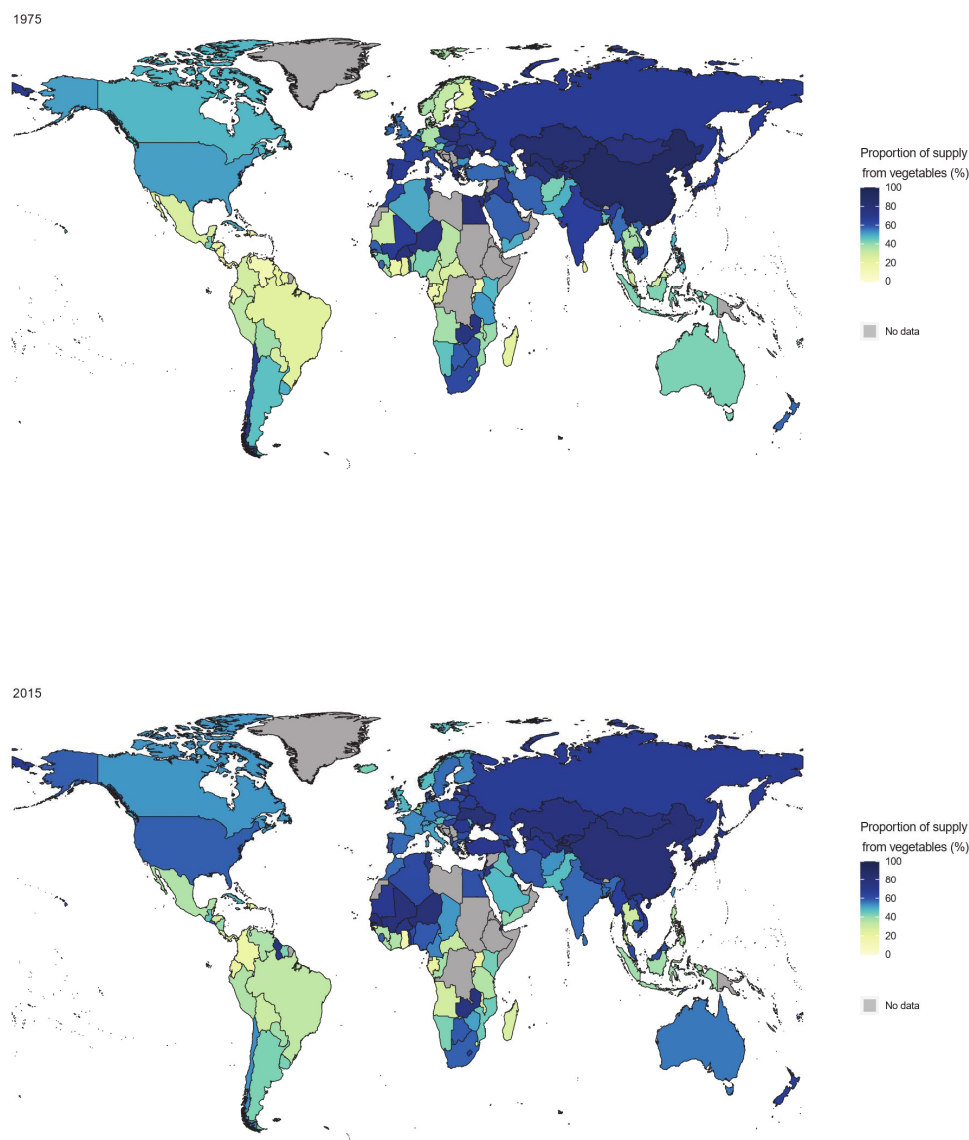

1

2 **Appendix Figure 2.** Proportion of fruit and vegetable supply from vegetables by country in 1975 and

3 2015. Grey colour indicates that countries were not included in analyses.

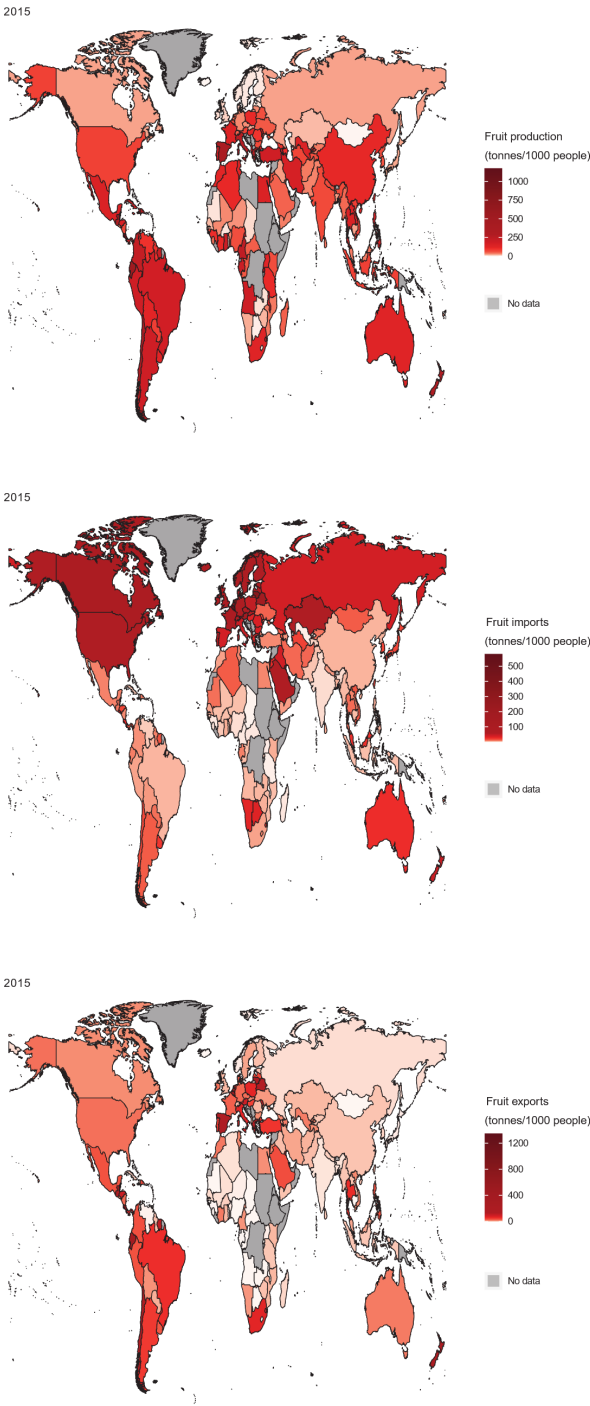

1  
2 **Appendix Figure 3a.** Fruit production, imports and exports by country in 2015. Grey colour indicates  
3 that countries were not included in analyses.

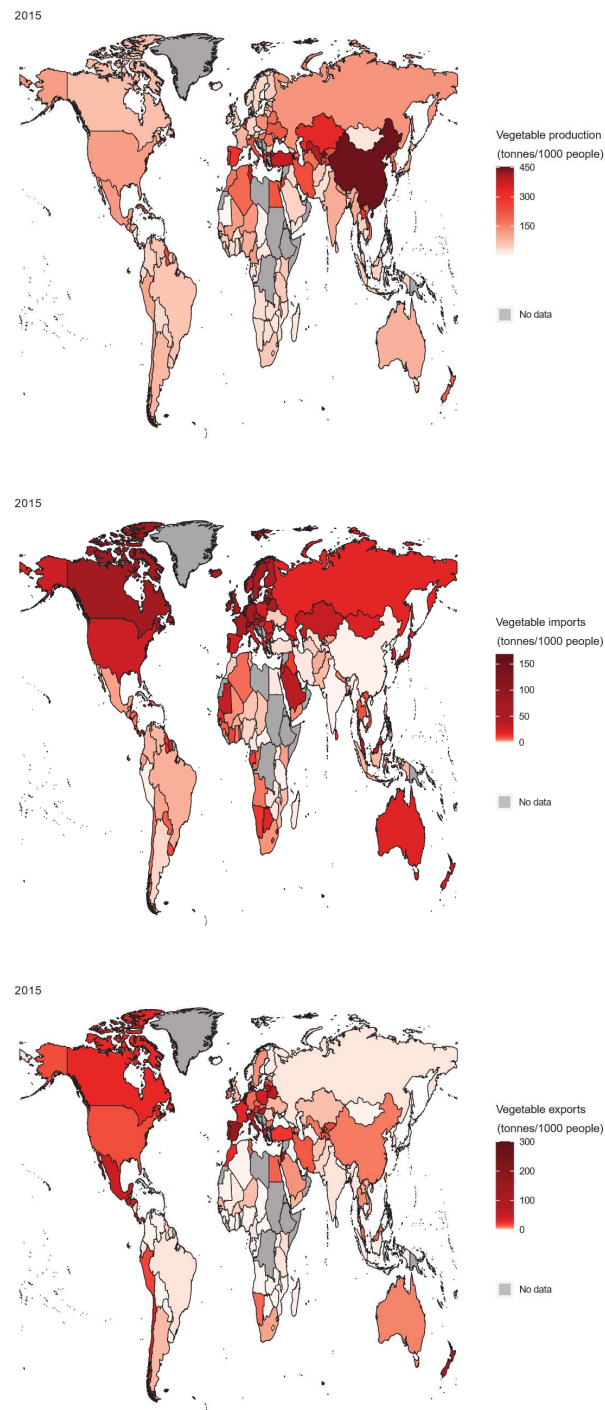

1

2 **Appendix Figure 3b.** Vegetable production, imports and exports by country in 2015. Grey colour

3 indicates that countries were not included in analyses.

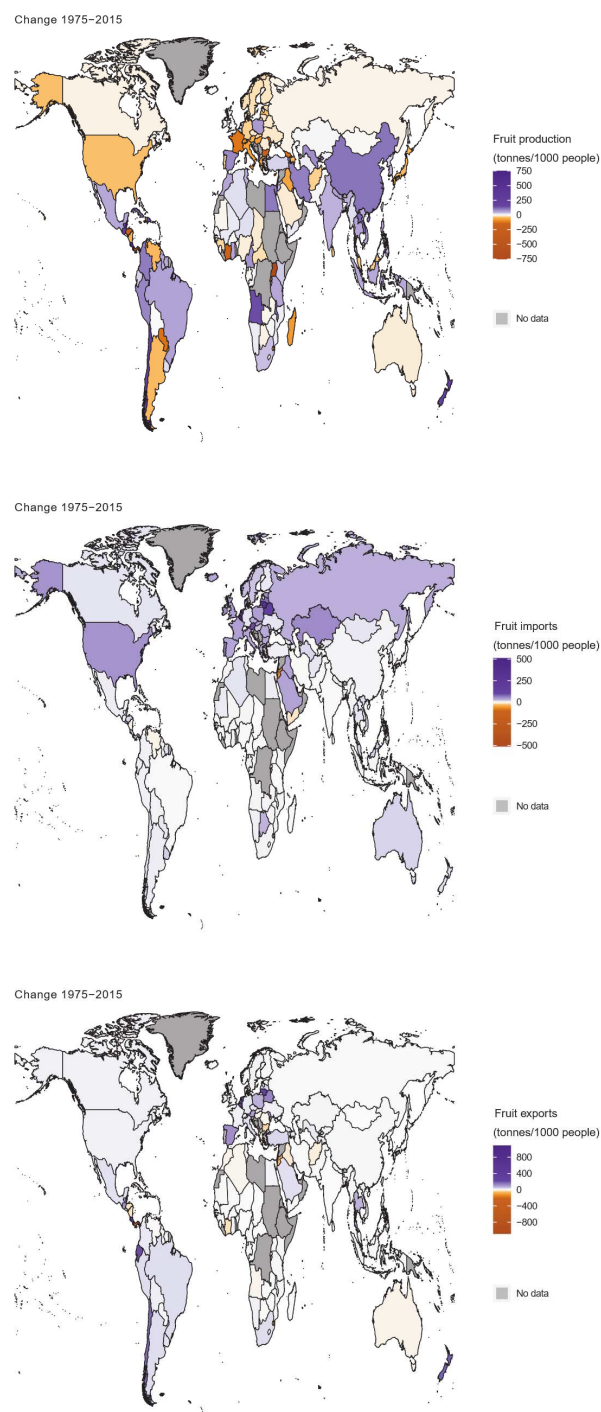

1

2 **Appendix Figure 4a.** Change in fruit production, imports and exports by country from 1975 to 2015.

3 Grey colour indicates that countries were not included in analyses.

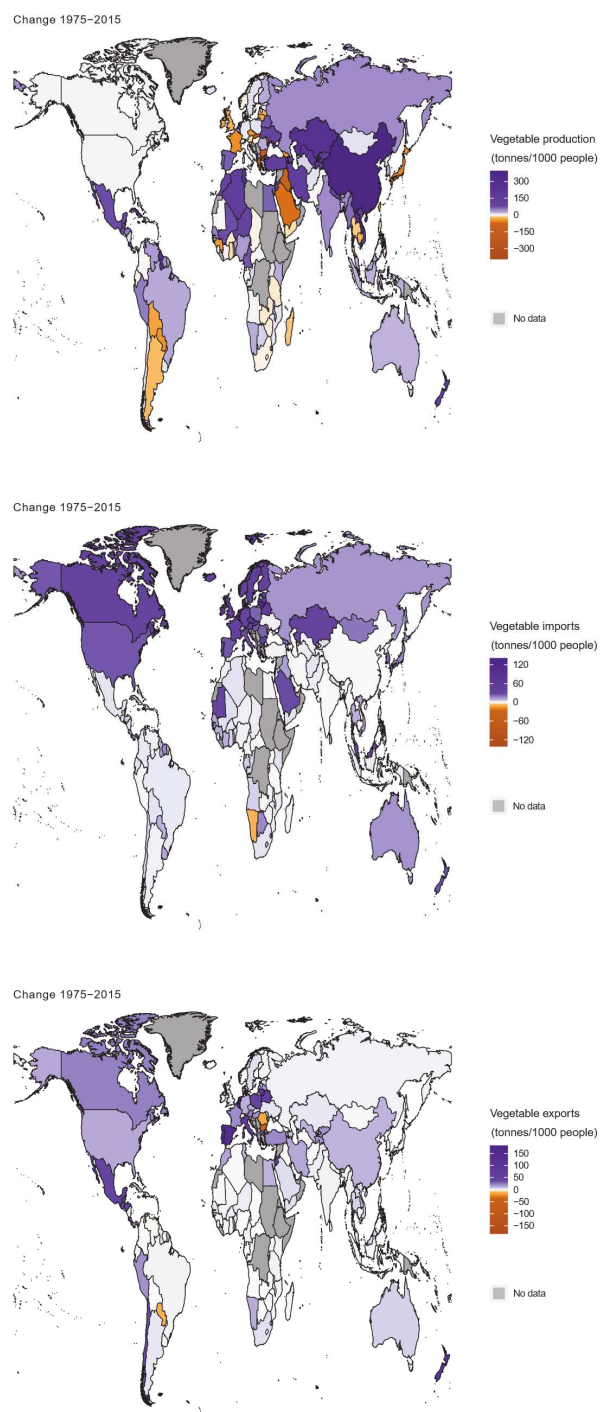

1

2 **Appendix Figure 4b.** Change in vegetable production, imports and exports by country from 1975 to

3 2015. Grey colour indicates that countries were not included in analyses.
